# Supplementary material for: Synthesis, structure and a nucleophilic coordination reaction of Germanetellurones
Source: Royal Society of Chemistry journal article supplement (doi:10.1039/c4dt00937a), 2014-01-01
Supplement: c4dt00937a1.pdf [file c4dt00937a1.pdf]

Supporting Information S1–S7 for

**Synthesis, Structure, and a Nucleophilic Coordination Reaction of Germanetellurones**

Bin Li,<sup>a</sup> Yan Li,<sup>a</sup> Na Zhao,<sup>a</sup> Yuefei Chen,<sup>a</sup> Yujue Chen,<sup>a</sup> Gang Fu,<sup>a</sup> Hongping Zhu<sup>\*,a</sup> and Yuqiang Ding<sup>\*,b</sup>

<sup>a</sup> State Key Laboratory of Physical Chemistry of Solid Surfaces, National Engineering Laboratory for Green Chemical Productions of Alcohols-Ethers-Esters, College of Chemistry and Chemical Engineering, Xiamen University, Xiamen, Fujian, 361005, China

<sup>b</sup> School of Chemical and Material Engineering, Jiangnan University, Wuxi, Jiangsu, 224161, China

**I. Crystal data collection and structural refinement details**

**Table 1s.** For compounds **1**, **2**, **4**, and **5**

|                                                     | <b>1</b>                                                          | <b>2</b>                                                                        | <b>4<sup>b</sup></b>                                              | <b>5<sub>2</sub></b>                                                                            |
|-----------------------------------------------------|-------------------------------------------------------------------|---------------------------------------------------------------------------------|-------------------------------------------------------------------|-------------------------------------------------------------------------------------------------|
| formula                                             | C <sub>34</sub> H <sub>46</sub> GeN <sub>2</sub>                  | C <sub>82</sub> H <sub>100</sub> Fe <sub>2</sub> Ge <sub>2</sub> N <sub>4</sub> | C <sub>34</sub> H <sub>46</sub> GeN <sub>2</sub> Te               | C <sub>82</sub> H <sub>100</sub> Fe <sub>2</sub> Ge <sub>2</sub> N <sub>4</sub> Te <sub>2</sub> |
| fw                                                  | 555.32                                                            | 1398.54                                                                         | 682.92                                                            | 1653.74                                                                                         |
| cryst syst                                          | Monoclinic                                                        | Triclinic                                                                       | Orthorhombic                                                      | Monoclinic                                                                                      |
| space group                                         | <i>P2<sub>1</sub>/n</i>                                           | <i>P</i> -1                                                                     | <i>Pna2<sub>1</sub></i>                                           | <i>P2<sub>1</sub>/c</i>                                                                         |
| <i>a</i> /Å                                         | 13.4531(5)                                                        | 14.148(3)                                                                       | 16.739(3)                                                         | 12.8840(5)                                                                                      |
| <i>b</i> /Å                                         | 16.6254(5)                                                        | 17.098(3)                                                                       | 9.7212(19)                                                        | 18.4790(13)                                                                                     |
| <i>c</i> /Å                                         | 14.7792(5)                                                        | 17.556(4)                                                                       | 20.247(4)                                                         | 31.6633(14)                                                                                     |
| <i>α</i> /deg                                       |                                                                   | 107.85(3)                                                                       |                                                                   |                                                                                                 |
| <i>β</i> /deg                                       | 110.700(4)                                                        | 110.20(3)                                                                       |                                                                   | 90.677(4)                                                                                       |
| <i>γ</i> /deg                                       |                                                                   | 97.91(3)                                                                        |                                                                   |                                                                                                 |
| <i>V</i> /Å <sup>3</sup>                            | 3092.17(18)                                                       | 3650.4(13)                                                                      | 3294.6(11)                                                        | 7538.0(7)                                                                                       |
| <i>Z</i>                                            | 4                                                                 | 2                                                                               | 4                                                                 | 4                                                                                               |
| $\rho_{\text{calcd}}/\text{g}\cdot\text{cm}^{-3}$   | 1.193                                                             | 1.272                                                                           | 1.377                                                             | 1.457                                                                                           |
| $\mu/\text{mm}^{-1}$                                | 1.014                                                             | 1.250                                                                           | 1.821                                                             | 1.971                                                                                           |
| <i>F</i> (000)                                      | 1184                                                              | 1472                                                                            | 1392                                                              | 3360                                                                                            |
| crystal size/mm <sup>3</sup>                        | 0.45×0.40×0.20                                                    | 0.49×0.20×0.16                                                                  | 0.40×0.40×0.10                                                    | 0.30×0.20×0.12                                                                                  |
| $\theta$ range/deg                                  | 2.82–26.00                                                        | 2.99–27.47                                                                      | 3.15–26.00                                                        | 2.71–26.00                                                                                      |
|                                                     | −16 ≤ <i>h</i> ≤ 16                                               | −18 ≤ <i>h</i> ≤ 18                                                             | −20 ≤ <i>h</i> ≤ 18                                               | −15 ≤ <i>h</i> ≤ 15                                                                             |
| index ranges                                        | −20 ≤ <i>k</i> ≤ 17                                               | −22 ≤ <i>k</i> ≤ 22                                                             | −11 ≤ <i>k</i> ≤ 11                                               | −22 ≤ <i>k</i> ≤ 22                                                                             |
|                                                     | −18 ≤ <i>l</i> ≤ 11                                               | −22 ≤ <i>l</i> ≤ 22                                                             | −24 ≤ <i>l</i> ≤ 24                                               | −39 ≤ <i>l</i> ≤ 38                                                                             |
| collected data                                      | 13154                                                             | 57128                                                                           | 25512                                                             | 44382                                                                                           |
| unique data                                         | 6062                                                              | 16498                                                                           | 6445                                                              | 14765                                                                                           |
|                                                     | ( <i>R</i> <sub>int</sub> = 0.0238)                               | ( <i>R</i> <sub>int</sub> = 0.0630)                                             | ( <i>R</i> <sub>int</sub> = 0.0402)                               | ( <i>R</i> <sub>int</sub> = 0.0904)                                                             |
| completeness to $\theta$ (%)                        | 99.6                                                              | 98.6                                                                            | 99.8                                                              | 99.8                                                                                            |
| data/restraints/params                              | 6062/0/344                                                        | 16498/942/931                                                                   | 6445/426/329                                                      | 14765/380/875                                                                                   |
| GOF on <i>F</i> <sup>2</sup>                        | 1.027                                                             | 1.095                                                                           | 1.047                                                             | 0.999                                                                                           |
| final <i>R</i> indices [ <i>I</i> > 2 ( <i>I</i> )] | <i>R</i> <sub>1</sub> = 0.0309<br><i>wR</i> <sub>2</sub> = 0.0727 | <i>R</i> <sub>1</sub> = 0.0375<br><i>wR</i> <sub>2</sub> = 0.0821               | <i>R</i> <sub>1</sub> = 0.0404<br><i>wR</i> <sub>2</sub> = 0.0982 | <i>R</i> <sub>1</sub> = 0.0657<br><i>wR</i> <sub>2</sub> = 0.0831                               |
| <i>R</i> indices (all data)                         | <i>R</i> <sub>1</sub> = 0.0391                                    | <i>R</i> <sub>1</sub> = 0.0654                                                  | <i>R</i> <sub>1</sub> = 0.0528                                    | <i>R</i> <sub>1</sub> = 0.1233                                                                  |

|                                                         | $wR_2 = 0.0755$ | $wR_2 = 0.1029$ | $wR_2 = 0.1049$ | $wR_2 = 0.0972$ |
|---------------------------------------------------------|-----------------|-----------------|-----------------|-----------------|
| Largest diff peak/hole<br>( $e \cdot \text{\AA}^{-3}$ ) | 0.311/-0.288    | 0.955/-0.779    | 0.751/-0.719    | 0.850/-0.845    |

<sup>a</sup> All data were collected at 173(2) K using Mo  $K_{\alpha}$  ( $\lambda = 0.71073 \text{ \AA}$ ) radiation.  $R_1 = \sum(|F_o| - |F_c|)/\sum|F_o|$ ,  $wR_2 = [\sum w(F_o^2 - F_c^2)^2/\sum w(F_o^2)]^{1/2}$ , GOF =  $[\sum w(F_o^2 - F_c^2)^2/(N_o - N_p)]^{1/2}$ . <sup>b</sup> The data recorded here for **4** is corresponding to structure **4a** (Figure 2s). The data for structure **4b** are slightly changed after final refinements ( $wR_2 = 0.0983$  and largest diff peak/hole ( $e \cdot \text{\AA}^{-3}$ ) is 0.753/-0.714. The others are the same).

**Table 2s.** For compounds **6–9**<sup>a</sup>

|                                                         | <b>6-0.5n-hexane</b>                                              | <b>7<sup>c</sup></b>                                                              | <b>8</b>                                                            | <b>9</b>                                                                 |
|---------------------------------------------------------|-------------------------------------------------------------------|-----------------------------------------------------------------------------------|---------------------------------------------------------------------|--------------------------------------------------------------------------|
| formula                                                 | C <sub>40</sub> H <sub>53</sub> GeN <sub>2</sub> Te               | C <sub>34</sub> H <sub>46</sub> Cl <sub>2</sub> Ge <sub>2</sub> N <sub>2</sub> Te | C <sub>36</sub> H <sub>44</sub> AuF <sub>5</sub> GeN <sub>2</sub> S | C <sub>36</sub> H <sub>44</sub> AuF <sub>5</sub> GeN <sub>2</sub> S<br>e |
| fw                                                      | 762.03                                                            | 826.41                                                                            | 901.35                                                              | 948.25                                                                   |
| cryst syst                                              | Monoclinic                                                        | Monoclinic                                                                        | Triclinic                                                           | Triclinic,                                                               |
| space group                                             | <i>P2<sub>1</sub>/n</i>                                           | <i>P2<sub>1</sub>/n</i>                                                           | <i>P-1</i>                                                          | <i>P-1</i>                                                               |
| <i>a</i> /\AA                                           | 12.9507(8)                                                        | 9.7181(7)                                                                         | 10.1603(4)                                                          | 10.224(2)                                                                |
| <i>b</i> /\AA                                           | 18.5924(10)                                                       | 18.7331(13)                                                                       | 12.8671(7)                                                          | 12.966(3)                                                                |
| <i>c</i> /\AA                                           | 17.3739(9)                                                        | 19.6618(12)                                                                       | 15.0468(9)                                                          | 15.085(3)                                                                |
| $\alpha$ /deg                                           |                                                                   |                                                                                   | 66.571(5)                                                           | 66.54(3)                                                                 |
| $\beta$ /deg                                            | 92.59(3)                                                          | 90.562(6)                                                                         | 74.778(4)                                                           | 74.75(3)                                                                 |
| $\gamma$ /deg                                           |                                                                   |                                                                                   | 84.434(4)                                                           | 84.32(3)                                                                 |
| <i>V</i> /\AA <sup>3</sup>                              | 4091.5(4)                                                         | 3579.3(4)                                                                         | 1741.55(16)                                                         | 1770.0(6)                                                                |
| <i>Z</i>                                                | 4                                                                 | 4                                                                                 | 2                                                                   | 2                                                                        |
| $\rho_{\text{calcd}}$ /g·cm <sup>-3</sup>               | 1.237                                                             | 1.534                                                                             | 1.719                                                               | 1.779                                                                    |
| $\mu$ /mm <sup>-1</sup>                                 | 1.474                                                             | 2.652                                                                             | 5.185                                                               | 1.779                                                                    |
| <i>F</i> (000)                                          | 1564                                                              | 1656                                                                              | 892                                                                 | 928                                                                      |
| crystal size/mm <sup>3</sup>                            | 0.30×0.30×0.10                                                    | 0.15×0.10×0.02                                                                    | 0.40×0.20×0.10                                                      | 0.15×0.10×0.03                                                           |
| $\theta$ range/deg                                      | 3.10–26.00                                                        | 3.02–26.00                                                                        | 2.69–26.00                                                          | 3.00–25.00                                                               |
| index ranges                                            | -15 ≤ <i>h</i> ≤ 14<br>-21 ≤ <i>k</i> ≤ 22<br>-12 ≤ <i>l</i> ≤ 21 | -11 ≤ <i>h</i> ≤ 11<br>-11 ≤ <i>k</i> ≤ 23<br>-14 ≤ <i>l</i> ≤ 24                 | -12 ≤ <i>h</i> ≤ 12<br>-15 ≤ <i>k</i> ≤ 15<br>-18 ≤ <i>l</i> ≤ 18   | -12 ≤ <i>h</i> ≤ 12<br>-15 ≤ <i>k</i> ≤ 15<br>-17 ≤ <i>l</i> ≤ 17        |
| collected data                                          | 17544                                                             | 14585                                                                             | 20968                                                               | 13709                                                                    |
| unique data                                             | 8008<br>( $R_{\text{int}} = 0.0551$ )                             | 7008<br>( $R_{\text{int}} = 0.0998$ )                                             | 6838<br>( $R_{\text{int}} = 0.0982$ )                               | 6137<br>( $R_{\text{int}} = 0.1559$ )                                    |
| completeness to $\theta$ (%)                            | 99.7                                                              | 99.7                                                                              | 99.9                                                                | 98.6                                                                     |
| data/restraints/params                                  | 8008/5/436                                                        | 7008/0/370                                                                        | 6838/0/426                                                          | 6137/12/421                                                              |
| GOF on <i>F</i> <sup>2</sup>                            | 0.990                                                             | 0.999                                                                             | 1.010                                                               | 1.054                                                                    |
| final <i>R</i> indices [ <i>I</i> > 2 ( <i>I</i> )]     | $R_1 = 0.0604$<br>$wR_2 = 0.1272$                                 | $R_1 = 0.0798$<br>$wR_2 = 0.1018$                                                 | $R_1 = 0.0574$<br>$wR_2 = 0.1016$                                   | $R_1 = 0.1095$<br>$wR_2 = 0.2437$                                        |
| <i>R</i> indices (all data)                             | $R_1 = 0.1016$<br>$wR_2 = 0.1423$                                 | $R_1 = 0.1561$<br>$wR_2 = 0.1195$                                                 | $R_1 = 0.0799$<br>$wR_2 = 0.1099$                                   | $R_1 = 0.1803$<br>$wR_2 = 0.3055$                                        |
| Largest diff peak/hole<br>( $e \cdot \text{\AA}^{-3}$ ) | 0.713/-0.393                                                      | 0.876/-1.169                                                                      | 1.736 / -1.275                                                      | 2.288/-4.812                                                             |

<sup>a</sup> All data were collected at 173(2) K using Mo  $K_{\alpha}$  ( $\lambda = 0.71073 \text{ \AA}$ ) radiation.  $R_1 = \sum(|F_o| - |F_c|)/\sum|F_o|$ ,  $wR_2 = [\sum w(F_o^2 - F_c^2)^2/\sum w(F_o^2)]^{1/2}$ , GOF =  $[\sum w(F_o^2 - F_c^2)^2/(N_o - N_p)]^{1/2}$ . <sup>c</sup> The data recorded here for **7** is corresponding to structure **7a** (Figure 3s). The data for structure **7b** are not changed after final refinements.

## II. Crystal structures of Cp-bonded compounds 1, 4 and 7

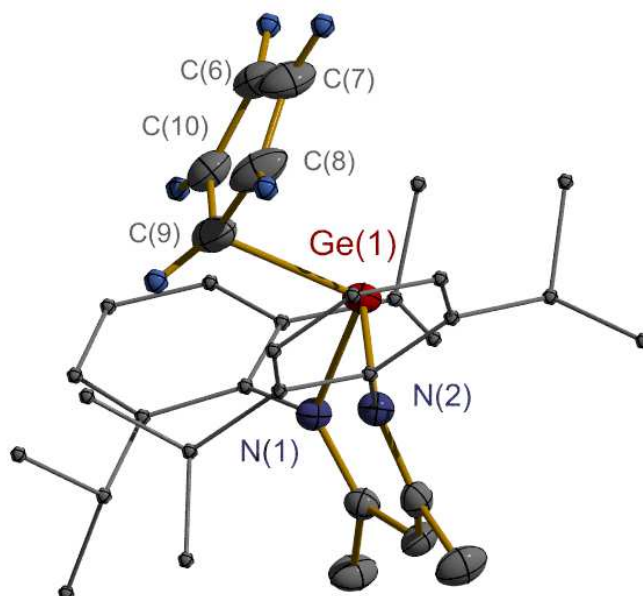

**Figure 1s.** X-ray crystal structure of **1**. Thermal ellipsoids are drawn at 50% probability level. H atoms at the Cp group are enhanced for clarity.

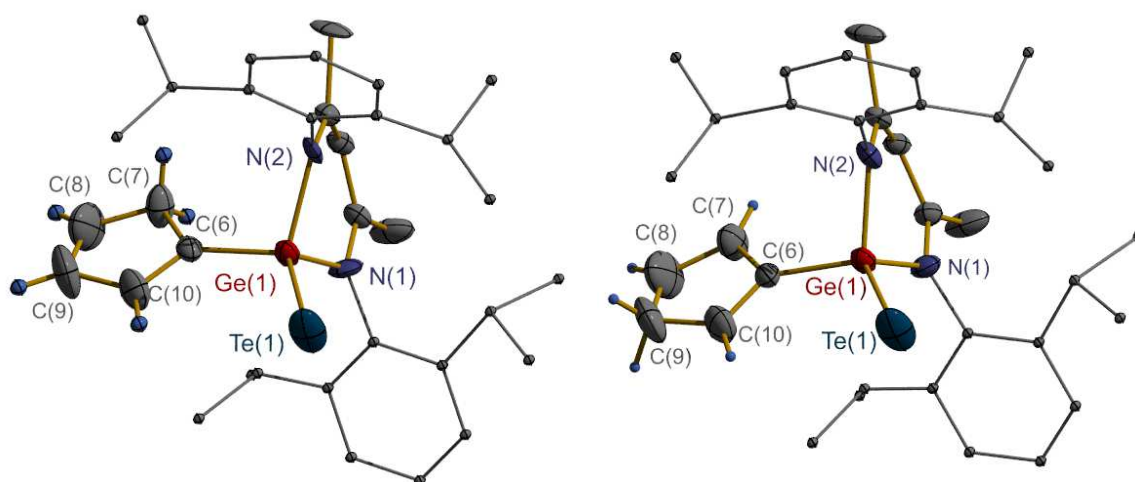

**Figure 2s.** X-ray crystal structures of **4** with two different hydrogen addition modes over the Cp ring corresponding to isomeric structures **4a** (left) and **4b** (right) shown in the text. Thermal ellipsoids are drawn at 50% probability level.

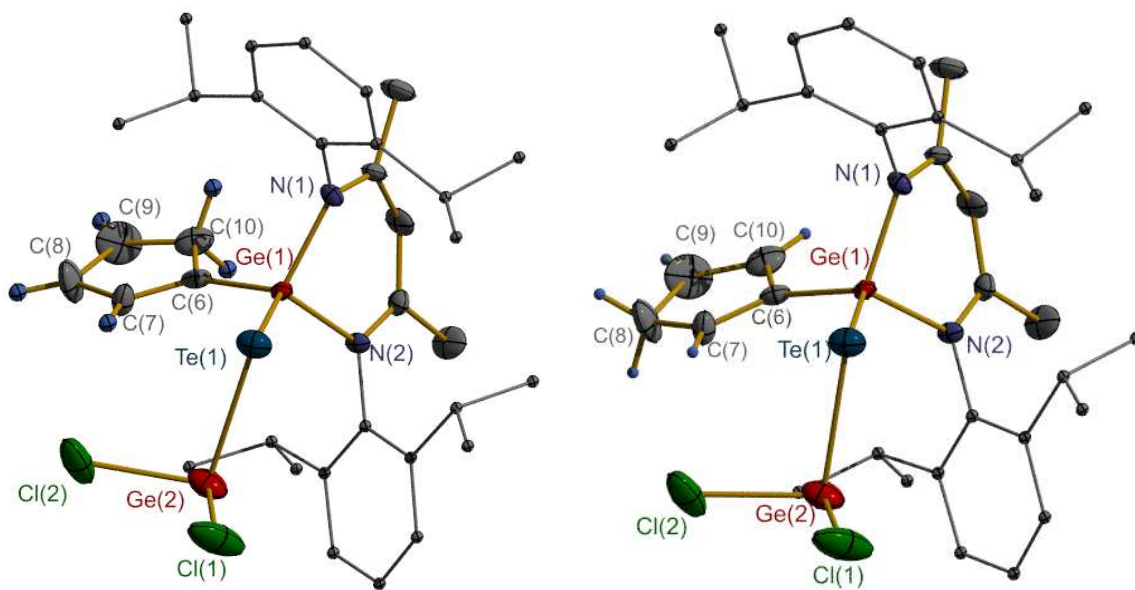

**Figure 3s.** X-ray crystal structures of **7** with two different hydrogen addition modes over the Cp ring corresponding to isomeric structures **7a** (left) and **7b** (right). Thermal ellipsoids are drawn at 50% probability level.

### III. Variable temperature (25–80 °C) $^1\text{H}$ NMR spectral studies of compound **4**

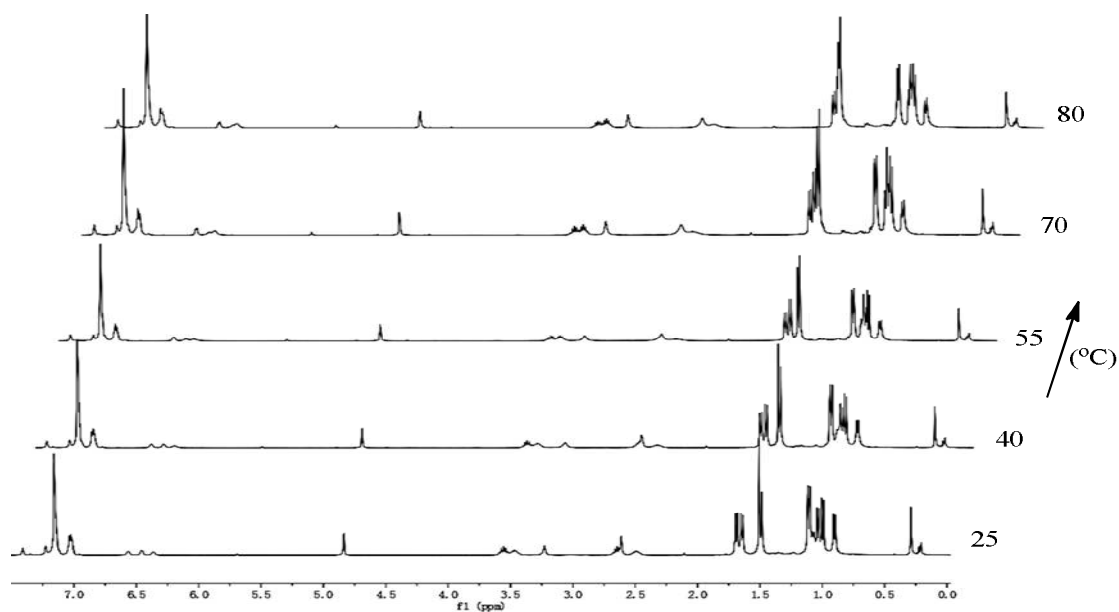

**Figure 4s.** Exhibition of a series of  $^1\text{H}$  NMR spectra of compound **4** recorded in  $\text{C}_6\text{D}_6$  at elevated temperatures.

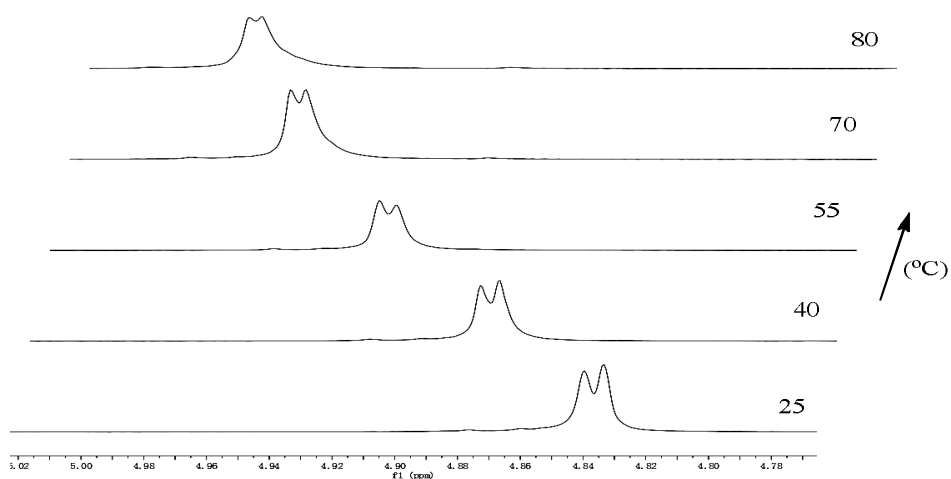

**Figure 5s.** Exhibition of the enhanced resonances for the L ligand backbone  $\gamma$ -CH proton of compound **4** at  $\delta$  4.77–5.02 ppm in Figure 4s.

#### IV. UV-vis spectra of compounds **1** and **2**

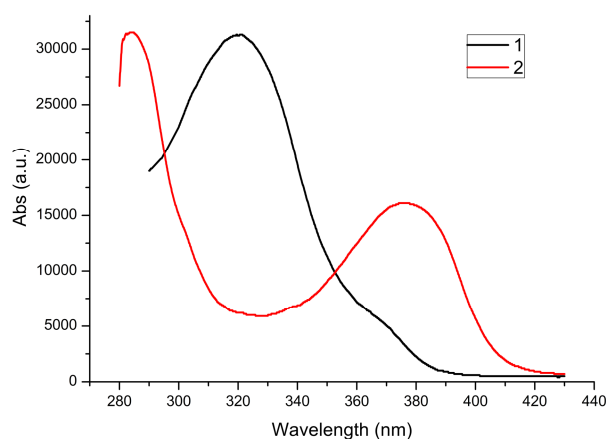

**Figure 6s.** UV-vis spectra of compounds **1** (black,  $\lambda_{\max}$  (peak), 320, 366 nm) and **2** (red,  $\lambda_{\max}$  (peak), 287, 344 nm) recorded in toluene at room temperature ( $1 \times 10^{-5}$  mol/L).

#### IV. DFT calculations

**Computational details:** All quantum-chemical calculations were carried out by using the Gaussian 09 program.<sup>1</sup> Geometry optimization for compound LGeR (R = Cp, C $\equiv$ CH) was performed by using B3LYP/6-31+G(d)<sup>2-6</sup> and that for LGe(Te)R (R = Cp, C $\equiv$ CH) was adopted on Stuttgart RSC 1997 ECP (to simplify the calculation, we use the H group instead of the Fc and Ph group).<sup>7</sup> Vibrational frequencies were calculated to ensure the optimized structure. Charge analyses were performed by using the natural bond orbital (NBO) program.<sup>8</sup> Computationally, it seems too difficult to directly calculate the enthalpies of reaction of LGeR with Te to form germanetellurone (eq (1)) because Te is

used as a solid powder. But, the bond disassociation energy (BDE) of Ge=Te could be calculated on considering the Te atom (the standard enthalpy value, 47.1 kcal/mol, has been experimentally determined<sup>9</sup>) according to eq (2) and (3).

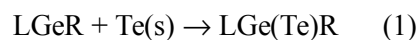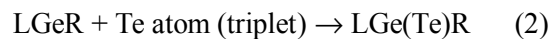

$$\text{BDE}_{\text{Ge=Te}} = \Delta H_{\text{LGe(Te)R}} - \Delta H_{\text{LGeR}} - \Delta H_{\text{Te atom}} \quad (3)$$

$$\Delta H_{\text{rxn}} = \text{BDE}_{\text{Ge=Te}} + \Delta H_{\text{f}}^{\circ}(\text{Te atom}) \quad (4)$$

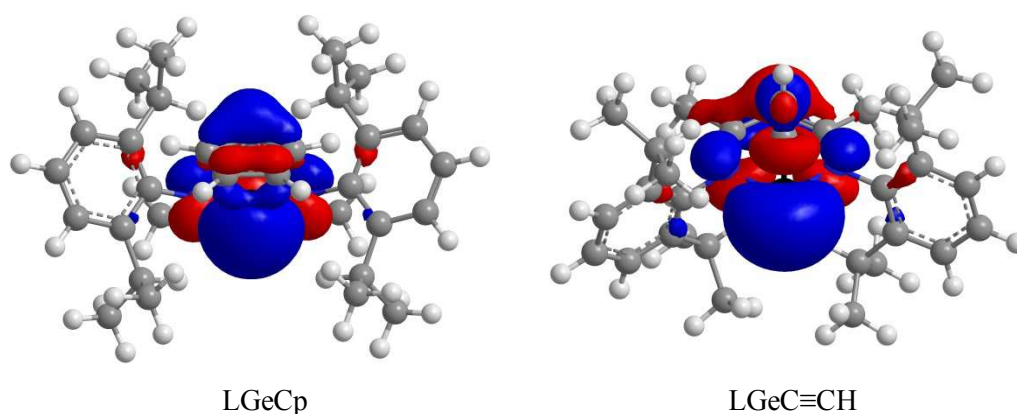

**Figure 7s.** HOMO orbital picture of LGeR

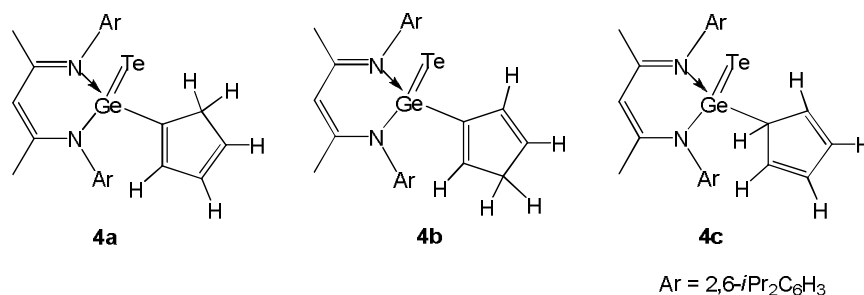

**Scheme 1s.** Three possible isomeric structures of compound **4** (Relative energies (kcal/mol), -2.5 for isomer **4a**, -1.0 for **4b**, and 0.0 for **4c**)

**Table 3s.** NBO analysis for LGeR (L = HC[C(Me)N-2,6-*i*Pr<sub>2</sub>C<sub>6</sub>H<sub>3</sub>]<sub>2</sub>)

| R    | NBO Charge of Ge | Characteristics of lone pair of Ge |                 |      |     |
|------|------------------|------------------------------------|-----------------|------|-----|
|      |                  | Occupation                         | Composition (%) |      |     |
|      |                  |                                    | s               | p    | d   |
| Cp   | +1.047           | 1.967                              | 86.5            | 13.5 | 0.0 |
| C≡CH | +0.983           | 1.943                              | 77.5            | 22.5 | 0.0 |

**Table 4s.** NBO analysis of LGe(Te)R (L = HC[C(Me)N-2,6-*i*Pr<sub>2</sub>C<sub>6</sub>H<sub>3</sub>]<sub>2</sub>)

| R    | NBO charge |        | HOMO-LUMO<br>gap (eV) | Characteristics of the Ge–Te bond |                      |                                |
|------|------------|--------|-----------------------|-----------------------------------|----------------------|--------------------------------|
|      | Ge         | Te     |                       | Occupation                        | Contributions<br>(%) | Composition (%)<br>s p d       |
| Cp   | +1.385     | -0.543 | 2.73                  | 1.932                             | Ge: 51.2<br>Te: 48.8 | 44.3 55.3 0.4<br>11.1 88.9 0.0 |
| C≡CH | +1.280     | -0.454 | 2.80                  | 1.944                             | Ge: 54.7<br>Te: 45.3 | 51.4 48.3 0.3<br>10.6 89.4 0.0 |

**Table 5s.** Calculated enthalpies for reactions of LGeR with Te to LGe(Te)R

| R    | Bond disassociation energy<br>(Ge=Te, kcal/mol) | $\Delta H_{\text{rxn}}$<br>(kcal/mol) |
|------|-------------------------------------------------|---------------------------------------|
| Cp   | 47.1                                            | 0.0                                   |
| C≡CH | 50.2                                            | -3.1                                  |

## References

- 1 M. J. Frisch, G. W. Trucks, H. B. Schlegel, G. E. Scuseria, M. A. Robb, J. R. Cheeseman, G. Scalmani, V. Barone, B. Mennucci, G. A. Petersson, H. Nakatsuji, M. Caricato, X. Li, H. P. Hratchian, A. F. Izmaylov, J. Bloino, G. Zheng, J. L. Sonnenberg, M. Hada, M. Ehara, K. Toyota, R. Fukuda, J. Hasegawa, M. Ishida, T. Nakajima, Y. Honda, O. Kitao, H. Nakai, T. Vreven, J. A. Montgomery, Jr., J. E. Peralta, F. Ogliaro, M. Bearpark, J. J. Heyd, E. Brothers, K. N. Kudin, V. N. Staroverov, R. Kobayashi, J. Normand, K. Raghavachari, A. Rendell, J. C. Burant, S. S. Iyengar, J. Tomasi, M. Cossi, N. Rega, J. M. Millam, M. Klene, J. E. Knox, J. B. Cross, V. Bakken, C. Adamo, J. Jaramillo, R. Gomperts, R. E. Stratmann, O. Yazyev, A. J. Austin, R. Cammi, C. Pomelli, J. W. Ochterski, R. L. Martin, K. Morokuma, V. G. Zakrzewski, G. A. Voth, P. Salvador, J. J. Dannenberg, S. Dapprich, A. D. Daniels, O. Farkas, J. B. Foresman, J. V. Ortiz, J. Cioslowski, and D. J. Fox, Gaussian 09, Revision A. 02, Gaussian, Inc., Wallingford, CT 200 (2009).
- 2 S. H. Vosko, L. Wilk and M. Nusair, *Can. J. Phys.*, 1980, **58**, 1200.
- 3 A. D. Becke, *Phys. Rev. A*, 1988, **38**, 3098.
- 4 A. D. Becke, *J. Chem. Phys.*, 1993, **98**, 5648.
- 5 C. T. Lee, W. T. Yang and R.G. Parr, *Phys. Rev. B*, 1988, **37**, 785.
- 6 W. J. Hehre, R. Ditchfield and J. A. Pople, *J. Chem. Phys.*, 1972, **56**, 2257.
- 7 M. Dolg, H. Stoll, H. Preuss and R. M. Pitzer, *J. Phys. Chem.*, 1993, **97**, 5852 and these basis sets and ECPs correspond to Revision: Fri Jun 27 1997 of the Stuttgart/Dresden groups.
- 8 A. E. Reed and F. Weinhold, *J. Chem. Phys.* 1983, **78**, 4066.
- 9 Experimental value taken from <http://www.wiredchemist.com/chemistry/data/enthalpies>.
